# Supplementary material for: The influence of platform switching and platform matching on marginal bone loss in immediately inserted dental implants: a retrospective clinical study
Source: Springer Nature journal article supplement (doi:10.1186/s40729-025-00604-y), 2025-03-04
Supplement: MOESM2 [file 40729_2025_604_MOESM2_ESM.pdf]

# The Influence of Platform Switching and Platform Matching on Marginal Bone Loss in Immediately Inserted Dental Implants: A Retrospective Clinical Study

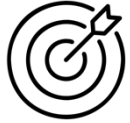

Effects of platform switching (PS) and platform matching (PM) on marginal bone loss (MBL) and clinical parameters in immediately inserted dental implants

## Methods

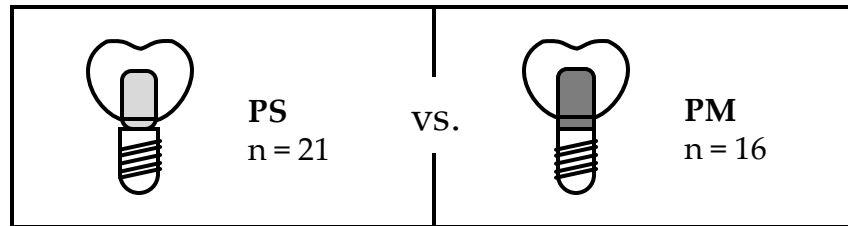

Retrospective design

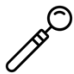

Clinical  
outcomes

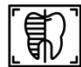

X-ray analysis

MBL [mm] on mesial  
(m) and distal (d) side

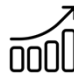

Regression  
models of total  
bone loss

## Results

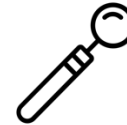

- ▶ No differences in probing depths, plaque index, or overall implant success

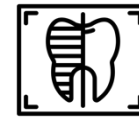

- ▶ MBL PS: 0.26 (m) and 0.68 (d); MBL PM: 0.75 (m) and 0.53 (d)
- ▶ Lower current mesial bone levels in PS group ( $p. = 0.044$ )

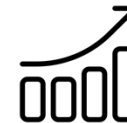

- ▶ PM implants were associated with greater mesial bone loss ( $p. = 0.039$ )

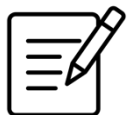

Despite both systems being viable options, platform switching may offer advantages in preserving peri-implant bone in immediately inserted dental implants.
